# Supplementary material for: Cellulose Nanocrystals as Template for Improving the Crystallinity of Two-Dimensional Covalent Organic Framework Films
Source: Polymers (Basel). 2021 May 13;13(10):1561. doi: 10.3390/polym13101561 (PMC8152767; doi:10.3390/polym13101561)
Supplement: Supplementary file 1 [file polymers-13-01561-s001.zip › polymers-1181989-supplementary.pdf]

Supplementary Materials

# Cellulose Nanocrystals as Template for Improving the Crystallinity of Two-Dimensional Covalent Organic Framework Films

Yue Li <sup>1</sup>, Zhaowei Ou <sup>2</sup>, Baokun Liang <sup>3</sup>, Jing Yang <sup>4</sup>, Ruilian Chen <sup>2</sup>, Haoyuan Qi <sup>3,5</sup>, Ute Kaiser <sup>3</sup>, Wei Hong <sup>2</sup>, Xudong Chen <sup>2</sup>, Liangwei Du <sup>1,\*</sup>, Wei Liu <sup>4,\*</sup> and Zhikun Zheng <sup>2,\*</sup>

- <sup>1</sup> College of Chemistry and Chemical Engineering, Guangxi University, Nanning 530004, China; LeeYe8@126.com
  - <sup>2</sup> Key Laboratory for Polymeric Composite and Functional Materials of Ministry of Education, School of Chemistry, and State Key Laboratory of Optoelectronic Materials and Technologies, Sun Yat-Sen University, Guangzhou 510275, China; ouzhuw6@126.com (Z.O.); chenrlian@mail2.sysu.edu.cn (R.C.); hongwei9@mail.sysu.edu.cn (W.H.); cescxd@mail.sysu.edu.cn (X.C.)
  - <sup>3</sup> Central Facility of Electron Microscopy, Electron Microscopy Group of Materials Science, Universität Ulm, Ulm 89081, Germany; baokun.liang@uni-ulm.de (B.L.); haoyuan.qi@uni-ulm.de (H.Q.); ute.kaiser@uni-ulm.de (U.K.)
  - <sup>4</sup> Key Laboratory of Low-Carbon Chemistry & Energy Conservation of Guangdong Province, Key Laboratory for Polymeric Composite and Functional Materials of Ministry of Education, School of Materials Science and Engineering, Sun Yat-Sen University, Guangzhou 510275, China; yangj329@mail.sysu.edu.cn
  - <sup>5</sup> Center for Advancing Electronics Dresden (cfaed) & Faculty of Chemistry and Food Chemistry, Technische Universität Dresden, Dresden 01062, Germany
- \* Correspondence: dulily9@163.com (L.D.); liuw226@mail.sysu.edu.cn (W.L.); zhengzhikun@mail.sysu.edu.cn (Z.Z.)

Citation: Li, Y.; Ou, Z.; Liang, B.; Yang, J.; Chen, R.; Qi, H.; Kaiser, U.; Hong, W.; Chen, X.; Du, L.; et al. Cellulose Nanocrystals as Template for Improving the Crystallinity of Two-Dimensional Covalent Organic Framework Films. *Polymers* 2021, 13, 1561. <https://doi.org/10.3390/polym13101561>

Received: 29 March 2021  
Accepted: 3 May 2021  
Published: 13 May 2021

Publisher's Note: MDPI stays neutral with regard to jurisdictional claims in published maps and institutional affiliations.

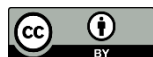

**Copyright:** © 2021 by the authors. Licensee MDPI, Basel, Switzerland. This article is an open access article distributed under the terms and conditions of the Creative Commons Attribution (CC BY) license (<http://creativecommons.org/licenses/by/4.0/>).

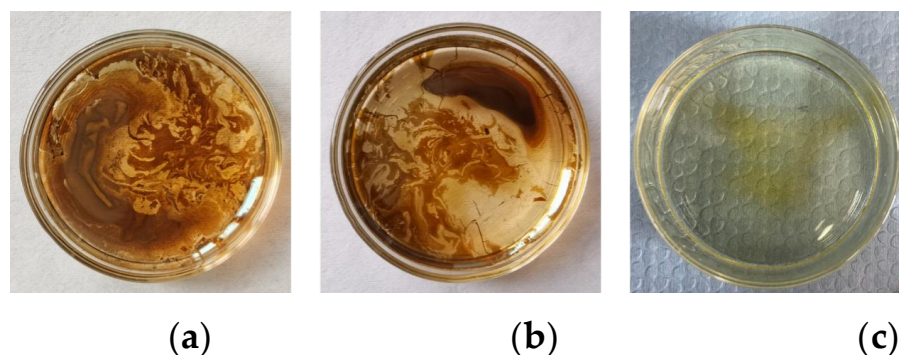

**Figure S1.** (a) Optical image of COF-366 film with PTSA and CNCs; (b) Optical image of COF-366 film without CNCs; (c) image of COF-366 film without PTSA.

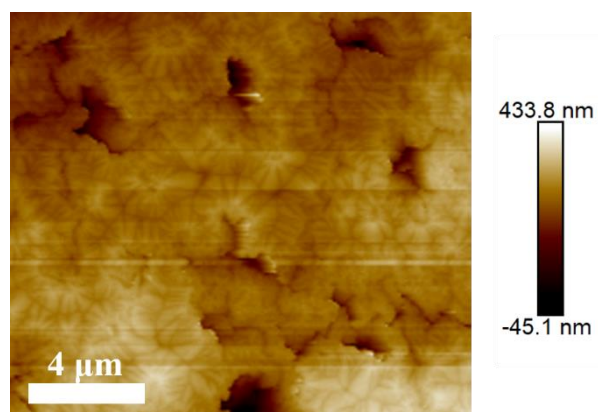

**Figure S2.** AFM image of the film without CNCs.

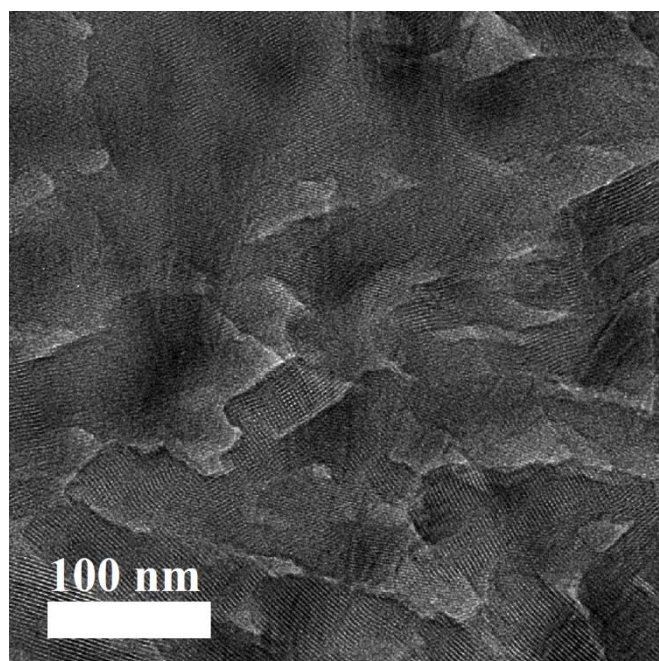

**Figure S3.** HR-TEM image of the flower center in COF-366 film 100  $\mu$ L CNCs.

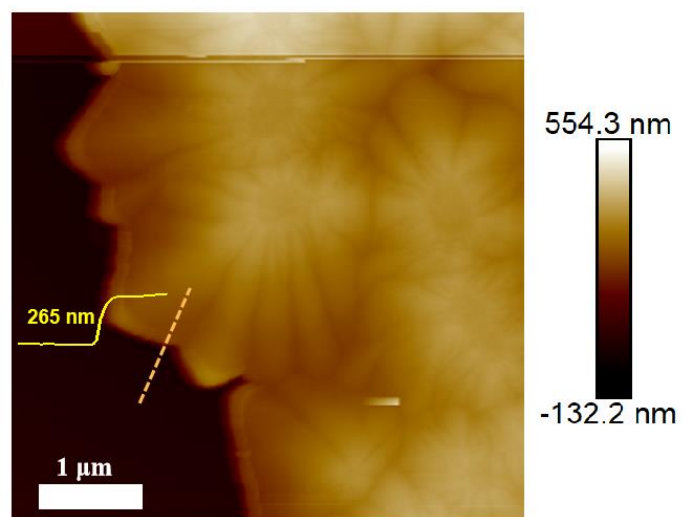

**Figure S4.** AFM height image of COF-366 film with 100  $\mu$ L CNCs and the corresponding line profiles.

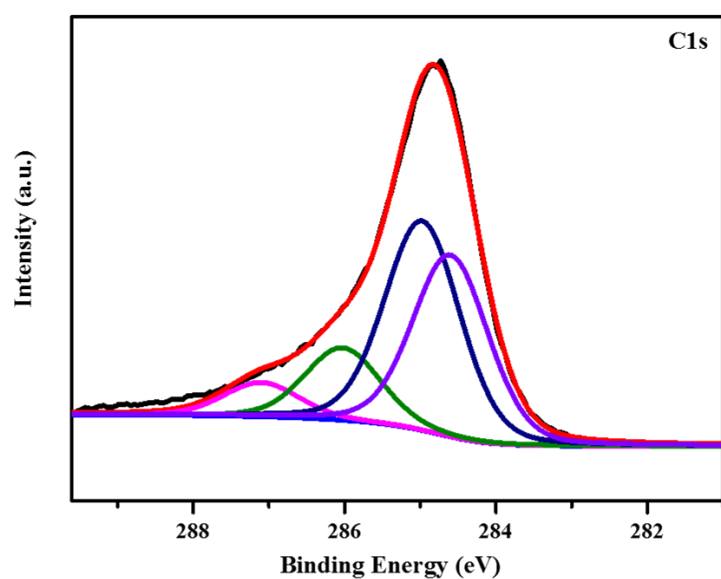

**Figure S5.** XPS spectra of C1s. There were four binding energy peaks at 284.6, 285.0, 286.1, and 287.2 eV in C1s signal spectra, belonging to aromatic carbon (aromatic: C=N, porphyrin units and benzene rings; pink curve), air pollution (green curve), C-N/ C-O bonds (blue curve), and aromatic carbon satellites (purple curve), respectively; fitting curve (red curve).

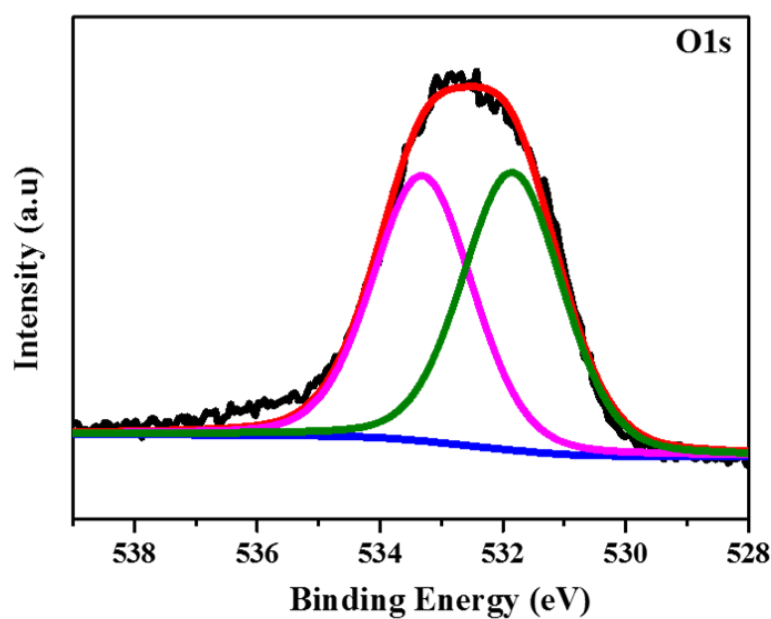

**Figure S6.** XPS spectra of O1s. There are two peaks with BEs at 533.3 and 531.9 eV, which are attributed to air contamination, and water and hydroxyl groups in the COF-366 film, respectively; background (blue curve); fitting curve (red curve).
